# Supplementary material for: Carbon quantum dot (CQD)-dithizone-based thin-film chemical sensors for the specific detection of lead ions in water resources
Source: Royal Society of Chemistry journal article supplement (doi:10.1039/d4ew00452c), 2024-01-01
Supplement: d4ew00452c1.pdf [file d4ew00452c1.pdf]

### Supplementary Information

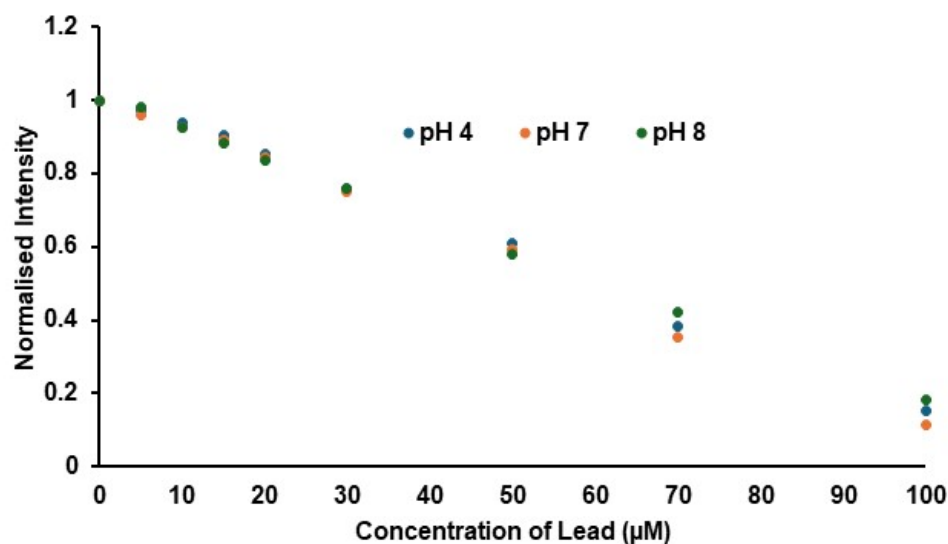

**Figure S1:** Comparison of calibration curve of lead different concentrations with fluorescence intensity of Dithizone -CQDs thin film in different pH buffers pH 4, pH 7, and pH 8.

**Table S1:** Accuracy result of spike and recovery studies in real tap water samples.

| Spiked Concentration | Recover concentration | % Recovery (Accuracy) |
|----------------------|-----------------------|-----------------------|
| 5 µM                 | 5.07 µM               | 101.4%                |

|                   |                      |         |
|-------------------|----------------------|---------|
| 10 $\mu\text{M}$  | 10.07 $\mu\text{M}$  | 100.7%  |
| 15 $\mu\text{M}$  | 15.08 $\mu\text{M}$  | 100.5%  |
| 20 $\mu\text{M}$  | 20.15 $\mu\text{M}$  | 100.7%  |
| 30 $\mu\text{M}$  | 30.09 $\mu\text{M}$  | 100.3%  |
| 50 $\mu\text{M}$  | 50.05 $\mu\text{M}$  | 100.1%  |
| 70 $\mu\text{M}$  | 70.09 $\mu\text{M}$  | 101.2%  |
| 100 $\mu\text{M}$ | 100.69 $\mu\text{M}$ | 100.69% |

---

**Table S2:** Accuracy result of spike and recovery studies in real Narmada river samples.

| <b>Spiked Concentration</b> | <b>Recover concentration</b> | <b>% Recovery (Accuracy)</b> |
|-----------------------------|------------------------------|------------------------------|
| 5 $\mu\text{M}$             | 5.10 $\mu\text{M}$           | 102%                         |
| 10 $\mu\text{M}$            | 10.15 $\mu\text{M}$          | 101.5%                       |
| 15 $\mu\text{M}$            | 15.11 $\mu\text{M}$          | 100.7%                       |
| 20 $\mu\text{M}$            | 20.16 $\mu\text{M}$          | 100.8%                       |
| 30 $\mu\text{M}$            | 30.24 $\mu\text{M}$          | 100.7%                       |
| 50 $\mu\text{M}$            | 50.16 $\mu\text{M}$          | 100.3%                       |
| 70 $\mu\text{M}$            | 70.22 $\mu\text{M}$          | 100.4%                       |
| 100 $\mu\text{M}$           | 100.26 $\mu\text{M}$         | 100.2%                       |

---

**Table S2:** Accuracy result of spike and recovery studies in real Kshipra river samples

| <b>Spiked Concentration</b> | <b>Recover concentration</b> | <b>% Recovery (Accuracy)</b> |
|-----------------------------|------------------------------|------------------------------|
|-----------------------------|------------------------------|------------------------------|

---

---

|                   |                      |        |
|-------------------|----------------------|--------|
| 5 $\mu\text{M}$   | 5.08 $\mu\text{M}$   | 101.6% |
| 10 $\mu\text{M}$  | 10.02 $\mu\text{M}$  | 100.2% |
| 15 $\mu\text{M}$  | 15.07 $\mu\text{M}$  | 100.4% |
| 20 $\mu\text{M}$  | 20.06 $\mu\text{M}$  | 100.3% |
| 30 $\mu\text{M}$  | 30.15 $\mu\text{M}$  | 100.5% |
| 50 $\mu\text{M}$  | 50.11 $\mu\text{M}$  | 100.2% |
| 70 $\mu\text{M}$  | 70.02 $\mu\text{M}$  | 100%   |
| 100 $\mu\text{M}$ | 101.05 $\mu\text{M}$ | 101%   |

---
